# Supplementary material for: Gene Expression of Putative Pathogenicity-Related Genes in Verticillium dahliae in Response to Elicitation with Potato Extracts and during Infection Using Quantitative Real-Time PCR
Source: MDPI journal article supplement (doi:10.3390/pathogens10050510), 2021-04-23
Supplement: s1 [file s1]

Supplementary Table S1 Signal peptides prediction by SignalP 5.0

| Protein ID                                                             | Prediction  | Likelihood of SP(Sec/SPI) | Likelihood of Other | CS Position                                                            |
|------------------------------------------------------------------------|-------------|---------------------------|---------------------|------------------------------------------------------------------------|
| Thioredoxin (VdTRX) (VDAG_04529)                                       | Other       | 0.000779                  | 0.999221            |                                                                        |
| NADH-ubiquinone oxidoreductase (VDAG_09026)                            | Other       | 0.001626                  | 0.998374            |                                                                        |
| Pyruvate dehydrogenase E1 component subunit beta (VdPDHB) (VDAG_01642) | Other       | 0.000773                  | 0.999227            |                                                                        |
| Ubiquitin-conjugating enzyme variant MMS2 (VDAG_05365)                 | Other       | 0.001165                  | 0.998835            |                                                                        |
| HAD-superfamily hydrolase (VDAG_08490)                                 | Other       | 0.000885                  | 0.999115            |                                                                        |
| Serine 3-dehydrogenase (VDAG_09532)                                    | Other       | 0.049198                  | 0.950802            |                                                                        |
| Wos2 (VDAG_08865)                                                      | Other       | 0.001621                  | 0.998379            |                                                                        |
| Ras-GAP like protein (VDAG_01012)                                      | Other       | 0.000241                  | 0.999759            |                                                                        |
| Xanthine dehydrogenase (VDAG_07735)                                    | Other       | 0.002117                  | 0.997883            |                                                                        |
| Myo-inositol 2-dehydrogenase (VDAG_08205)                              | Other       | 0.00212                   | 0.99788             |                                                                        |
| DNA-(apurinic or apyrimidinic site) lyase (DNA AP lyase) (VDAG_02445)  | Other       | 0.000489                  | 0.999511            |                                                                        |
| Serine/threonine-protein kinase (VDAG_04632)                           | Other       | 0.004421                  | 0.995579            |                                                                        |
| Glucan endo-1,3-alpha-glucosidase agn1 (VDAG_04101)                    | SP(Sec/SPI) | 0.986551                  | 0.013449            | CS pos: 22-23 (between amino acid "VQA" and "KS"); Probability: 0.9129 |
| DNA repair protein RAD51 (VDAG_08796)                                  | Other       | 0.000732                  | 0.999268            |                                                                        |
| Nuc-1 negative regulatory protein preg (PREG) (VDAG_06766)             | Other       | 0.000642                  | 0.999358            |                                                                        |

## Note:

Protein sequences were obtained from Verticillium comparative genomic project of the Broad Institute (<https://www.broadinstitute.org/scientific-community/science/projects/fungal-genome-initiative/verticillium-comparative-genomics-pro>), and input into SignalP 5.0 [25] for signal peptides prediction (<http://www.cbs.dtu.dk/services/SignalP/>);

SP(Sec/SPI): Secretory signal peptides transported by the Sec (Sec: secretory) translocon and cleaved by Signal Peptidase I;

Other: Protein do not possess a secretory signal peptide;

CS position (CS pos): Cleavage site position for Signal Peptidase.
