# Supplementary material for: Gene Expression of Putative Pathogenicity-Related Genes in Verticillium dahliae in Response to Elicitation with Potato Extracts and during Infection Using Quantitative Real-Time PCR
Source: MDPI journal article supplement (doi:10.3390/pathogens10050510), 2021-04-23
Supplement: s1 [file s1]

Supplementary Table S2 Effector prediction by Effector 1.0 &amp; 2.0

| Protein ID                                                             | Prediction by EffectorP 1.0 | Probability (EffectorP 1.0) | Prediction by EffectorP 2.0 | Probability (EffectorP 2.0) |
|------------------------------------------------------------------------|-----------------------------|-----------------------------|-----------------------------|-----------------------------|
| Thioredoxin (VdTRX) (VDAG_04529)                                       | Non-effector                | 1                           | Non-effector                | 0.966                       |
| NADH-ubiquinone oxidoreductase (VDAG_09026)                            | Non-effector                | 0.994                       | Non-effector                | 0.945                       |
| Pyruvate dehydrogenase E1 component subunit beta (VdPDHB) (VDAG_01642) | Non-effector                | 1                           | Non-effector                | 0.722                       |
| Ubiquitin-conjugating enzyme variant MMS2 (VDAG_05365)                 | Effector                    | 0.946                       | Effector                    | 0.72                        |
| HAD-superfamily hydrolase (VDAG_08490)                                 | Non-effector                | 0.663                       | Non-effector                | 0.667                       |
| Serine 3-dehydrogenase (VDAG_09532)                                    | Effector                    | 0.582                       | Non-effector                | 0.56                        |
| Wos2 (VDAG_08865)                                                      | Non-effector                | 1                           | Non-effector                | 0.912                       |
| Ras-GAP like protein (VDAG_01012)                                      | Non-effector                | 1                           | Non-effector                | 0.991                       |
| Xanthine dehydrogenase (VDAG_07735)                                    | Non-effector                | 1                           | Non-effector                | 0.956                       |
| Myo-inositol 2-dehydrogenase (VDAG_08205)                              | Non-effector                | 0.951                       | Effector                    | 0.572                       |
| DNA-(apurinic or apyrimidinic site) lyase (DNA AP lyase) (VDAG_02445)  | Non-effector                | 1                           | Non-effector                | 0.985                       |
| Serine/threonine-protein kinase (VDAG_04632)                           | Non-effector                | 1                           | Non-effector                | 0.988                       |
| Glucan endo-1,3-alpha-glucosidase agn1 (VDAG_04101)                    | Non-effector                | 1                           | Non-effector                | 0.99                        |
| DNA repair protein RAD51 (VDAG_08796)                                  | Non-effector                | 0.999                       | Non-effector                | 0.798                       |
| Nuc-1 negative regulatory protein preg (PREG) (VDAG_06766)             | Non-effector                | 1                           | Non-effector                | 0.911                       |

Note:

Protein sequences were obtained from Verticillium comparative genomic project of the Broad Institute (<https://www.broadinstitute.org/scientific-community/science/projects/fungal-genome-initiative/verticillium-comparative-genomics-pro>), and input into EffectorP 1.0 [27] & 2.0 [26] for effector prediction (<http://effectorp.csiro.au/>)
